# Supplementary material for: Influence of bulky yet flexible N-heterocyclic carbene ligands in gold catalysis
Source: publisher site journal article supplement (doi:10.3762/bjoc.11.196), 2015-10-02
Supplement: Additional file 1 [file 1860-5397-11-196-S1.pdf]

# Supporting Information

for

## **Influence of bulky yet flexible *N*-heterocyclic carbene ligands in gold catalysis**

Alba Collado<sup>1</sup>, Scott R. Patrick<sup>1</sup>, Danila Gasperini<sup>1</sup>, Sebastien Meiries<sup>1</sup> and Steven P. Nolan<sup>2\*</sup>

Address: <sup>1</sup>EaStCHEM School of Chemistry, University of St Andrews, St Andrews, KY16 9ST (UK) and

<sup>2</sup>Chemistry Department, College of Science, King Saud University, Riyadh 11451, Saudi Arabia

Email: Steven P. Nolan\* - [stevenpnolan@gmail.com](mailto:stevenpnolan@gmail.com)

\* Corresponding author

### **Experimental information and full characterisation of the complexes including a copy of the NMR spectra**

#### **Table of contents**

|                                              |     |
|----------------------------------------------|-----|
| - General information.....                   | S2  |
| - Synthesis of the gold complexes.....       | S2  |
| - Catalytic experiments.....                 | S5  |
| - Copy of NMR spectra for all compounds..... | S6  |
| - References.....                            | S10 |

## General information

- All the reactions were conducted under air and technical grade solvents were used.
- ITent·HCl salts were prepared following the reported procedure.<sup>1</sup> [Au(ITent)(OH)] complexes were prepared following the reported procedure.<sup>2</sup> [Au(IPr)(NTf<sub>2</sub>)] was prepared following a literature procedure.<sup>3</sup> HNTf<sub>2</sub> was obtained from Sigma Aldrich.
- Other reagents were obtained from commercial sources and used without further purification.
- Deuterated CDCl<sub>3</sub> was purchased from Acros and dried over molecular sieves.
- <sup>1</sup>H, <sup>13</sup>C{<sup>1</sup>H}, and <sup>19</sup>F{<sup>1</sup>H} Nuclear Magnetic Resonance (NMR) spectra were recorded on a Bruker-400 MHz or 300 MHz spectrometer at ambient temperature in CDCl<sub>3</sub>. Chemical shifts (expressed in parts per million) are referenced to residual solvent peaks.
- Elemental analyses were performed at London Metropolitan University 166-220 Holloway Road, London, N7 8DB.

## Synthesis of the gold complexes

**Preparation of [Au(IPent)(NTf<sub>2</sub>)] (7):** A vial was charged, under air, with [Au(IPent)(OH)] (50.0 mg, 0.070 mmol) and HNTf<sub>2</sub> (21.6 mg, 0.077 mmol). The resulting mixture was dissolved in toluene (1.0 mL) and stirred for 1 h at room temperature. After this time the mixture was filtered through Celite® and rinsed with toluene (3 × 0.5 mL). The solvent was concentrated and pentane (2.0 mL) was added, affording a white solid which was washed with further portions of pentane (3 × 1.0 mL) and dried under vacuum. Yield: 47.1 mg (68%).

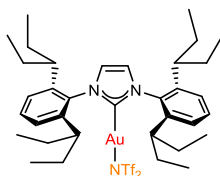

$^1\text{H}$  NMR (300 MHz,  $\text{CDCl}_3$ )  $\delta$  7.52 (t,  $J = 7.8$  Hz, 2H,  $\text{CH}_{\text{Ar}}$ ), 7.23 (d,  $J = 7.8$  Hz, 4H,  $\text{CH}_{\text{Ar}}$ ), 7.14 (s, 2H,  $\text{CH}^{4,5}$ ), 2.13-2.04 (m, 4H, CH), 1.87-1.60 (m, 12H,  $\text{CH}_2$ ), 1.56-1.43 (m, 4H,  $\text{CH}_2$ ), 0.91 (t,  $J = 7.4$  Hz, 12H,  $\text{CH}_3$ ), 0.78 (t,  $J = 7.4$  Hz, 12H,  $\text{CH}_3$ ).  $^{13}\text{C}\{^1\text{H}\}$  NMR (75 MHz,  $\text{CDCl}_3$ )  $\delta$  167.8 ( $\text{C}_{\text{carb}}$ ), 143.3 ( $\text{C}_{\text{Ar}}$ ), 136.2 ( $\text{C}_{\text{Ar}}$ ), 130.5 ( $\text{CH}_{\text{Ar}}$ ), 124.9 ( $\text{CH}_{\text{Ar}}$ ), 124.3 ( $\text{CH}^{4,5}$ ), 119.1 (q,  $J_{\text{C-F}} = 323.5$ ,  $\text{CF}_3$ ), 43.0 (CH), 29.1, and 28.0 ( $\text{CH}_2$ ), 12.6 and 12.5 ( $\text{CH}_3$ ).  $^{19}\text{F}\{^1\text{H}\}$  NMR (376 MHz,  $\text{CDCl}_3$ ).  $\delta$  -76.08 (s,  $\text{CF}_3$ ). Anal. Calcd. for  $\text{C}_{37}\text{H}_{52}\text{AuF}_6\text{N}_3\text{O}_4\text{S}_2$ : C 45.44; H 5.36; N 4.30. Found: C 45.55; H 5.43; N 4.40.

**Preparation of  $[\text{Au}(\text{IHept})(\text{NTf}_2)]$  (8):** A vial was charged, under air, with  $[\text{Au}(\text{IHept})(\text{OH})]$  (50.0 mg, 0.060 mmol) and  $\text{HNTf}_2$  (18.7 mg, 0.067 mmol). The resulting mixture was dissolved in toluene (1.0 mL) and stirred for 1 h at room temperature. After this time the mixture was filtered through Celite® and rinsed with toluene ( $3 \times 0.5$  mL). The solvent was concentrated and pentane (2.0 mL) was added, affording a white solid which was washed with further portions of pentane ( $3 \times 1.0$  mL) and dried under vacuum. Yield: 63.7 mg (97%).

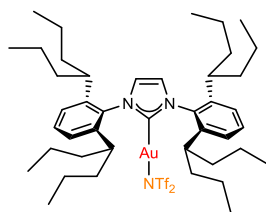

$^1\text{H}$  NMR (300 MHz,  $\text{CDCl}_3$ )  $\delta$  7.50 (t,  $J = 7.8$  Hz, 2H,  $\text{CH}_{\text{Ar}}$ ), 7.23 (d,  $J = 7.8$  Hz, 4H,  $\text{CH}_{\text{Ar}}$ ), 7.13 (s, 2H,  $\text{CH}^{4,5}$ ), 2.19 (p,  $J = 7.8$  Hz, 4H, CH), 1.76-1.66 (m, 4H,  $\text{CH}_2$ ), 1.65-1.53 (m, 8H,  $\text{CH}_2$ ), 1.49-1.35 (m, 8H,  $\text{CH}_2$ ), 1.25-1.13 (m, 8H,  $\text{CH}_2$ ), 1.12-1.02 (m, 4H,  $\text{CH}_2$ ), 0.87 (t,  $J =$

7.3 Hz, 12H, CH<sub>3</sub>), 0.83 (t, *J* = 7.3 Hz, 12H, CH<sub>3</sub>). <sup>13</sup>C{<sup>1</sup>H} NMR (75 MHz, CDCl<sub>3</sub>) δ 167.5 (C<sub>carb</sub>), 144.1 (C<sub>Ar</sub>), 135.5 (C<sub>Ar</sub>), 130.5 (CH<sub>Ar</sub>), 124.8 (CH<sub>Ar</sub>), 124.4 (CH<sup>4,5</sup>), 119.0 (q, *J*<sub>C-F</sub> = 323.4, CF<sub>3</sub>), 40.2 (CH), 39.9, 37.9, 21.9, and 21.3 (CH<sub>2</sub>), 14.5 and 14.4 (CH<sub>3</sub>). <sup>19</sup>F{<sup>1</sup>H} NMR (376 MHz, CDCl<sub>3</sub>). δ -76.04 (s, CF<sub>3</sub>). Anal. Calcd. for C<sub>45</sub>H<sub>68</sub>AuF<sub>6</sub>N<sub>3</sub>O<sub>4</sub>S<sub>2</sub>: C 49.58; H 6.29; N 3.85. Found: C 49.72; H 6.39; N 3.91.

**Preparation of [Au(INon)(NTf<sub>2</sub>)] (9):** A vial was charged, under air, with [Au(INon)(OH)] (50.0 mg, 0.042 mmol) and HNTf<sub>2</sub> (12.9 mg, 0.046 mmol). The resulting mixture was dissolved in toluene (1.0 mL) and stirred for 1 h at room temperature. After this time the mixture was filtered through Celite® and rinsed with toluene (3 × 0.5 mL). The solvent was concentrated and pentane (2.0 mL) was added, affording a white solid which was washed with further portions of pentane (3 × 1.0 mL) and dried under vacuum. Yield: 63.5 mg (99%).

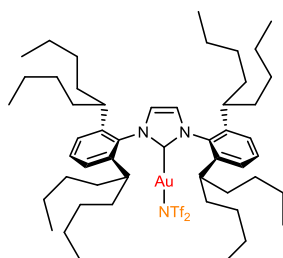

<sup>1</sup>H NMR (300 MHz, CDCl<sub>3</sub>) δ 7.51 (t, *J* = 7.8 Hz, 2H, CH<sub>Ar</sub>), 7.24 (d, *J* = 7.8 Hz, 4H, CH<sub>Ar</sub>), 7.13 (s, 2H, CH<sup>4,5</sup>), 2.20 (p, *J* = 7.0 Hz, 4H, CH), 1.78-1.55 (m, 12H, CH<sub>2</sub>), 1.48-1.11 (m, 32H, CH<sub>2</sub>), 1.09-1.00 (m, 4H, CH<sub>2</sub>), 0.86 (t, *J* = 7.1 Hz, 12H, CH<sub>3</sub>), 0.85 (t, *J* = 7.0 Hz, 12H, CH<sub>3</sub>). <sup>13</sup>C{<sup>1</sup>H} NMR (75 MHz, CDCl<sub>3</sub>) δ 167.7 (C<sub>carb</sub>), 144.1 (C<sub>Ar</sub>), 135.5 (C<sub>Ar</sub>), 130.5 (CH<sub>Ar</sub>), 124.8 (CH<sub>Ar</sub>), 124.3 (CH<sup>4,5</sup>), 119.0 (q, *J*<sub>C-F</sub> = 323.3, CF<sub>3</sub>), 40.2 (CH), 37.3, 35.0, 30.4, 30.2, 23.2 and 23.1 (CH<sub>2</sub>), 14.2 and 13.9 (CH<sub>3</sub>). <sup>19</sup>F{<sup>1</sup>H} NMR (376 MHz, CDCl<sub>3</sub>). δ -76.04 (s,

CF<sub>3</sub>). Anal. Calcd. for C<sub>53</sub>H<sub>84</sub>AuF<sub>6</sub>N<sub>3</sub>O<sub>4</sub>S<sub>2</sub>: C 52.94; H 7.04; N 3.49. Found: C 53.02; H 7.17; N 3.58.

### Catalytic experiments

**Hydration of phenylacetylene.** Under air, a vial was charged with phenylacetylene (0.5–1.0 mmol) and 1–2 mL of a 2:1 of dioxane/water solution. The corresponding amount of gold complex was added and the mixture was stirred at 80 °C for 1–3 h. After this time, pentane was added to the mixture to extract the organic product and the organic phase was analysed by GC analysis.

**Hydration of 4-methoxybenzonitrile.** Under air, a microwave vial was charged with 4-methoxybenzonitrile (66.6 mg, 0.50 mmol) and 1 mL of a 1:1 THF/water solution. The corresponding amount of gold complex was added and the mixture was stirred at 140 °C under microwave irradiation for 2 h. After this time, an aliquot of the mixture was analysed by <sup>1</sup>H NMR spectroscopy.

**Hydroalkoxylation/Claisen rearrangement of alkynes.** In a scintillation vial, diphenylacetylene (1 mmol), allylic alcohol (3 mmol) and [Au(NHC)(NTf<sub>2</sub>)] (0.2 mol %), were stirred neat at 120 °C. After 20 min, the mixture was analysed by GC analysis.

## NMR spectra

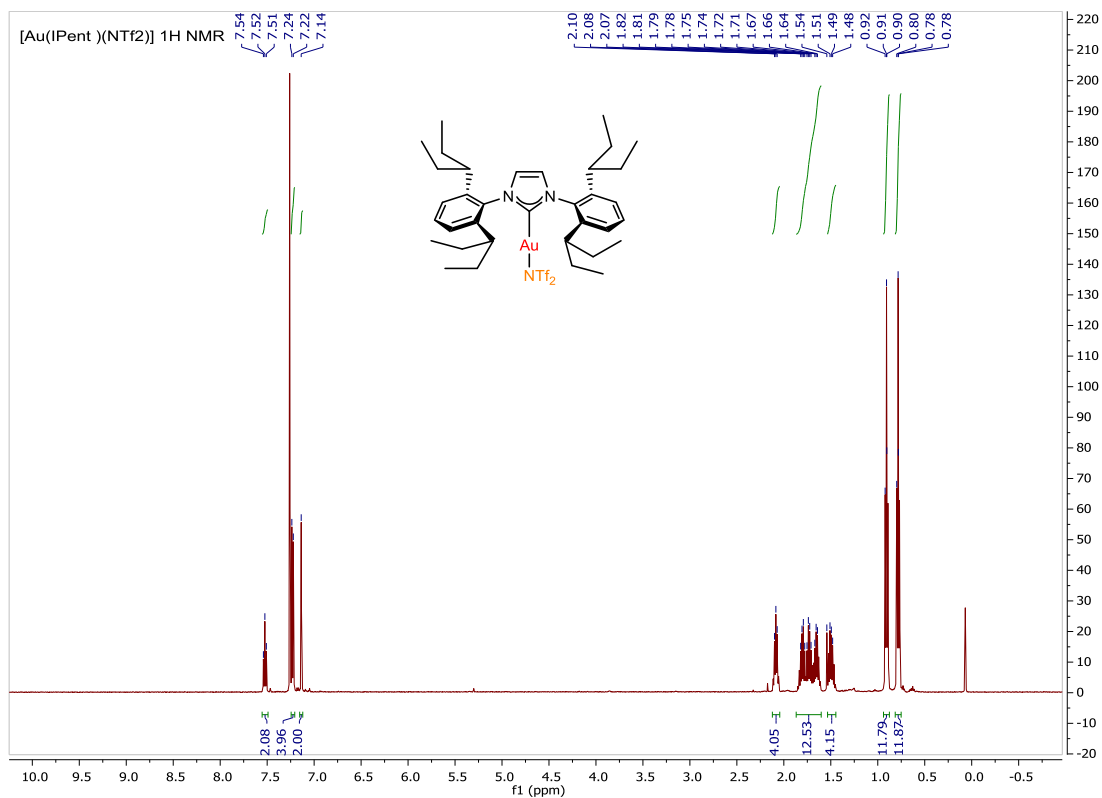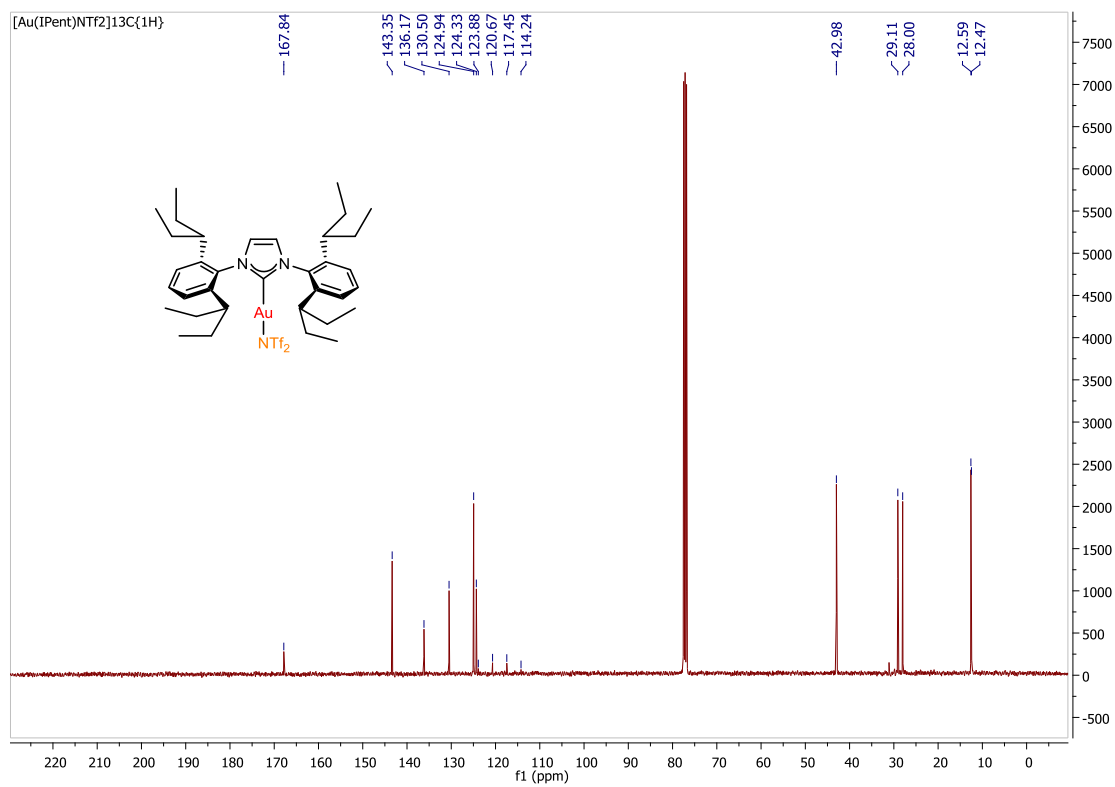

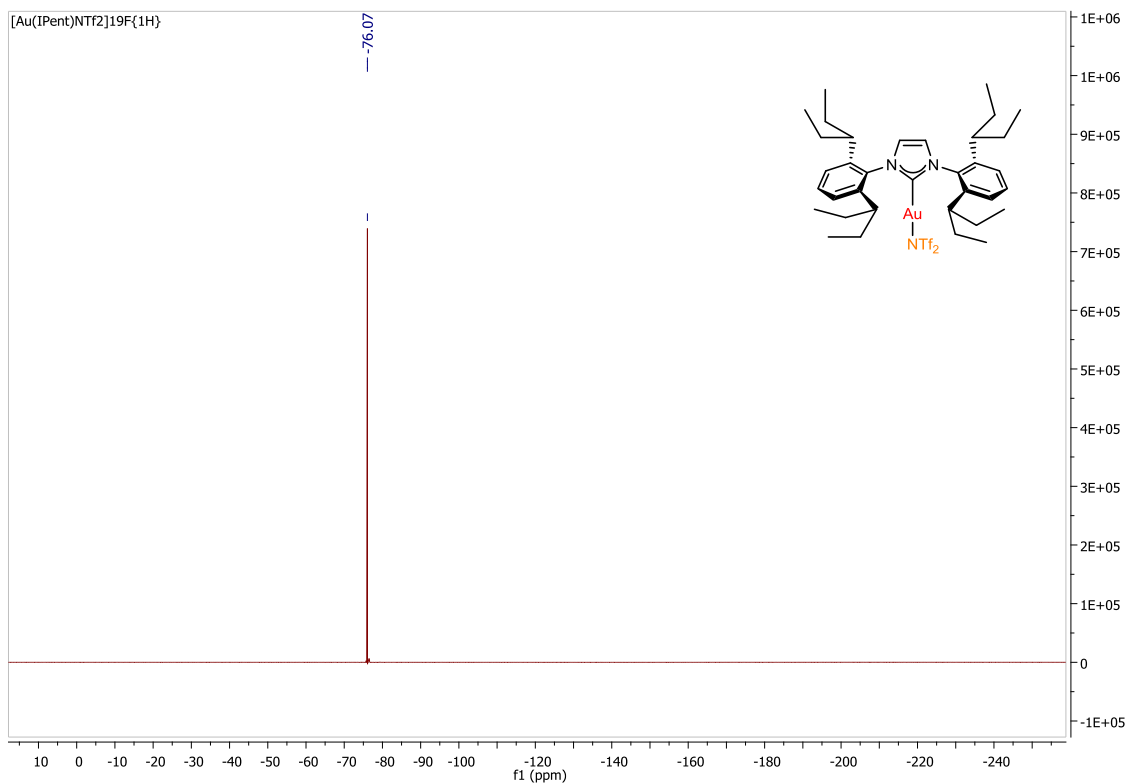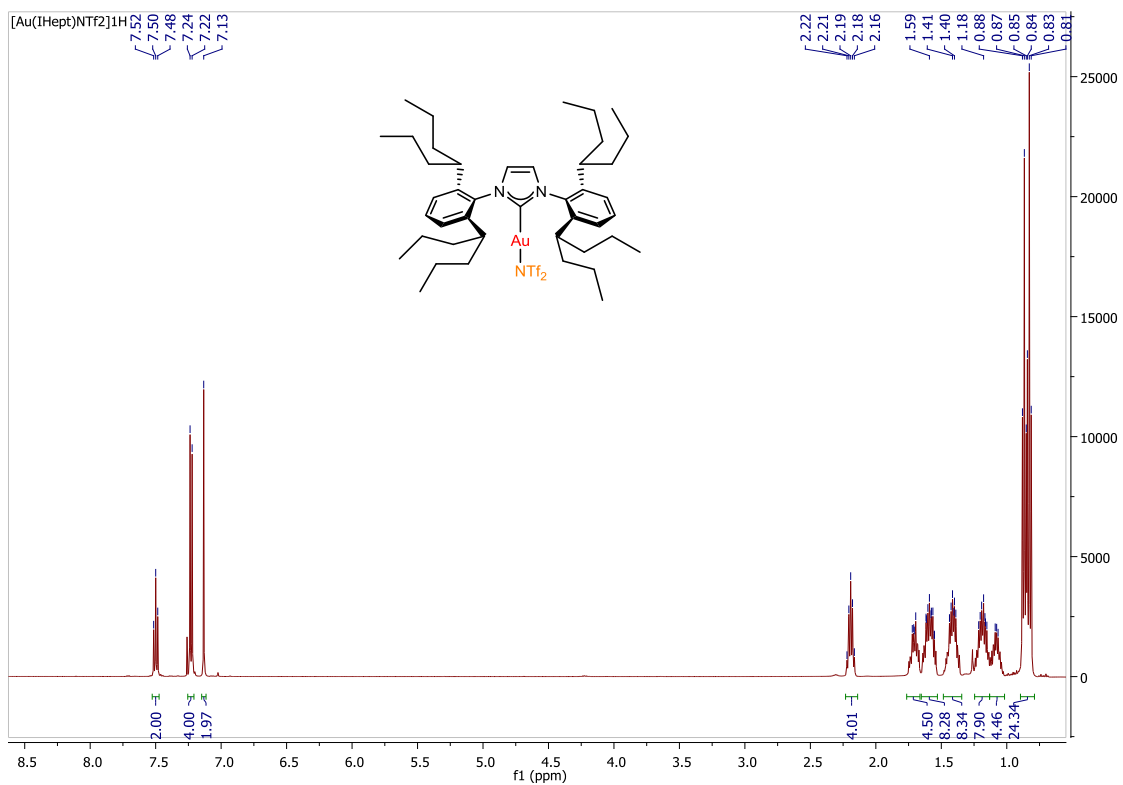

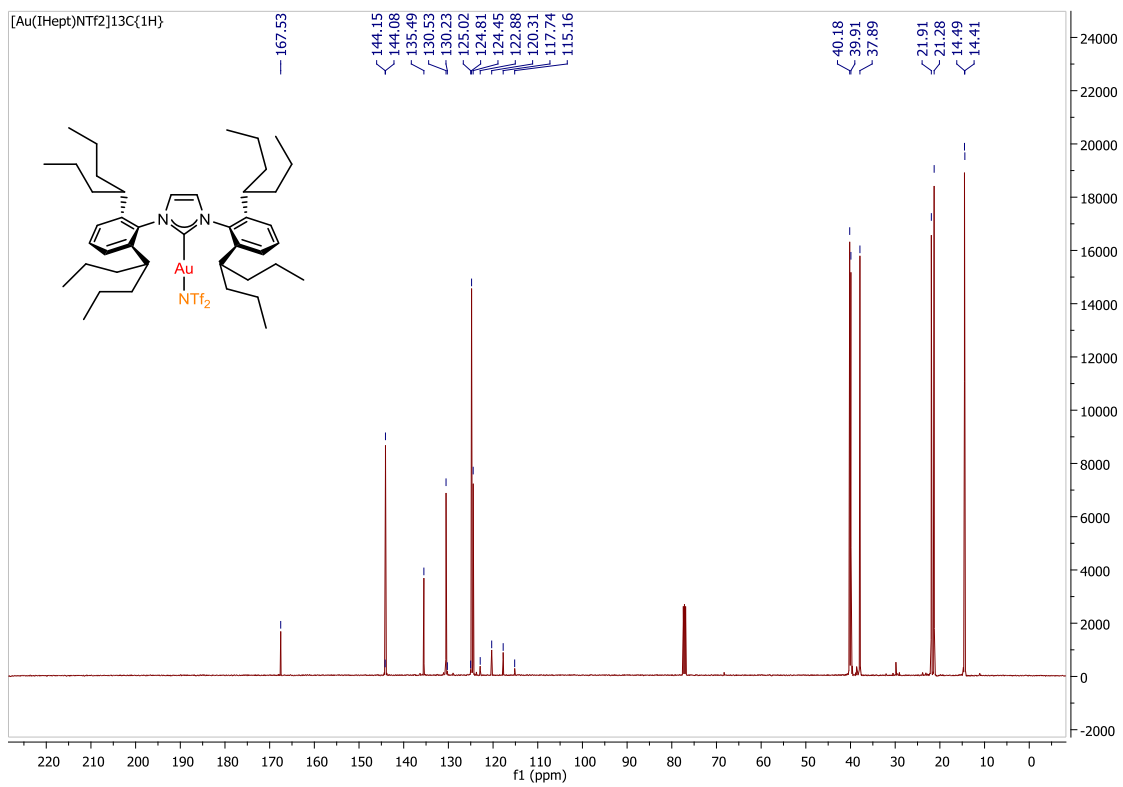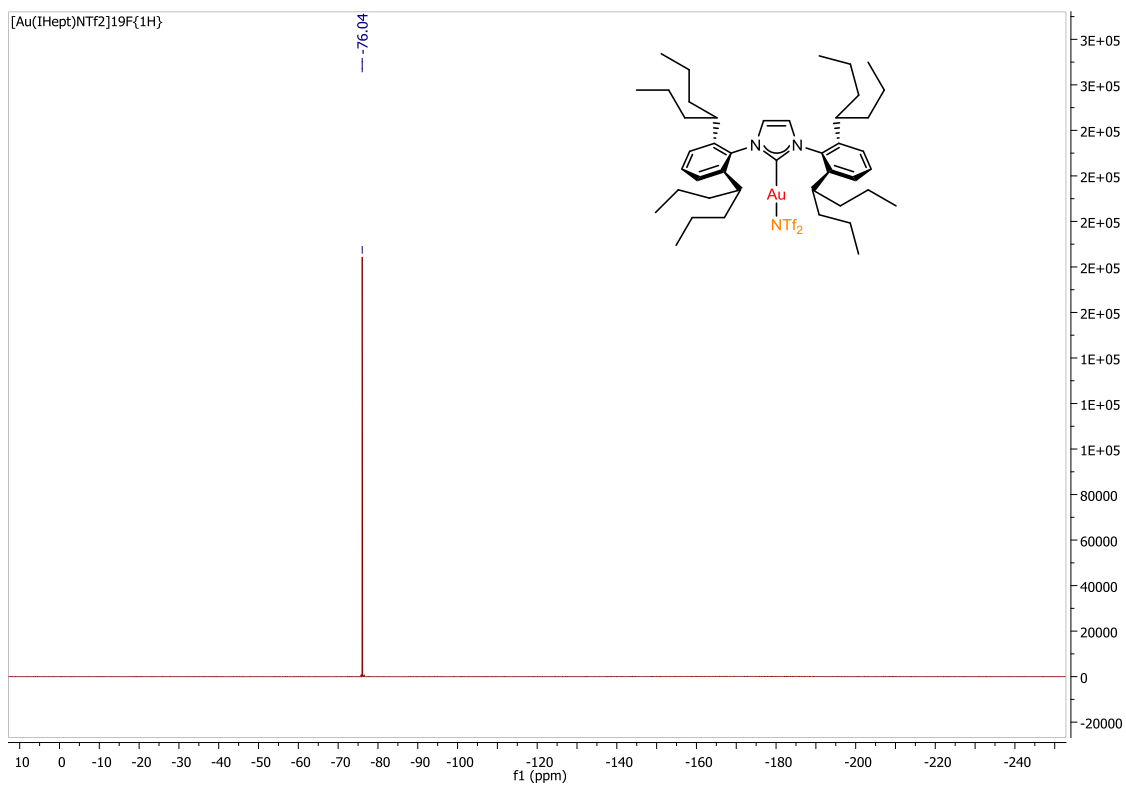



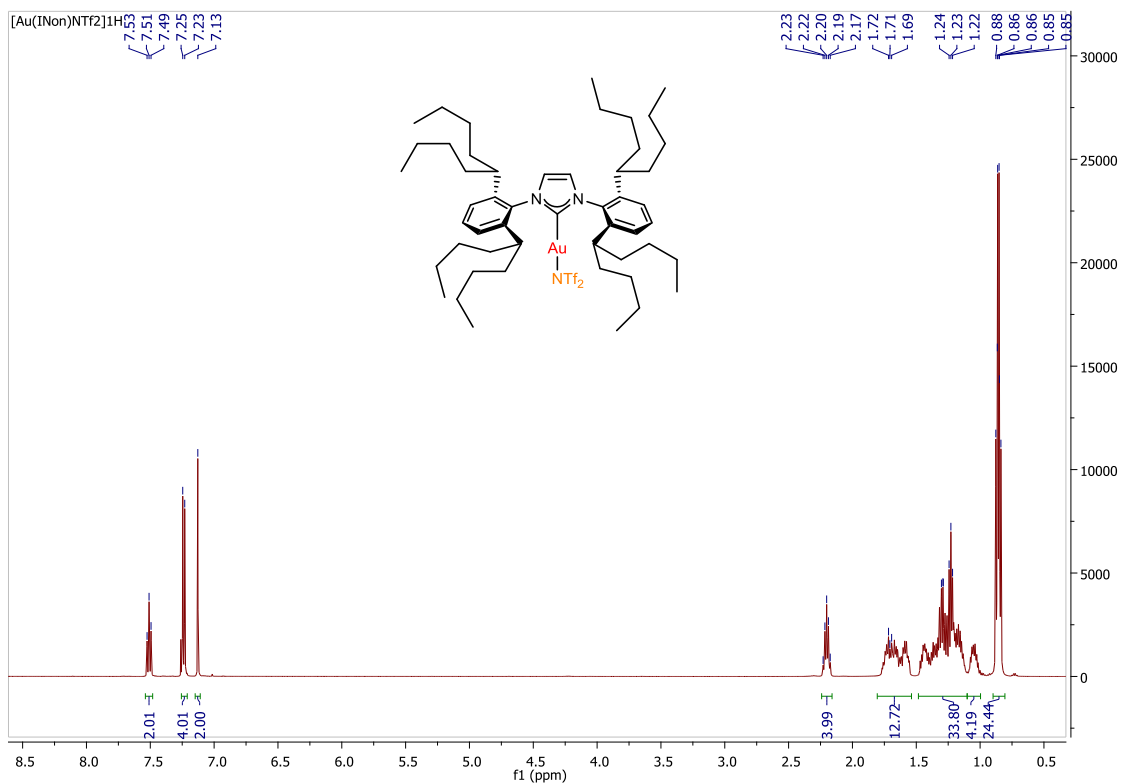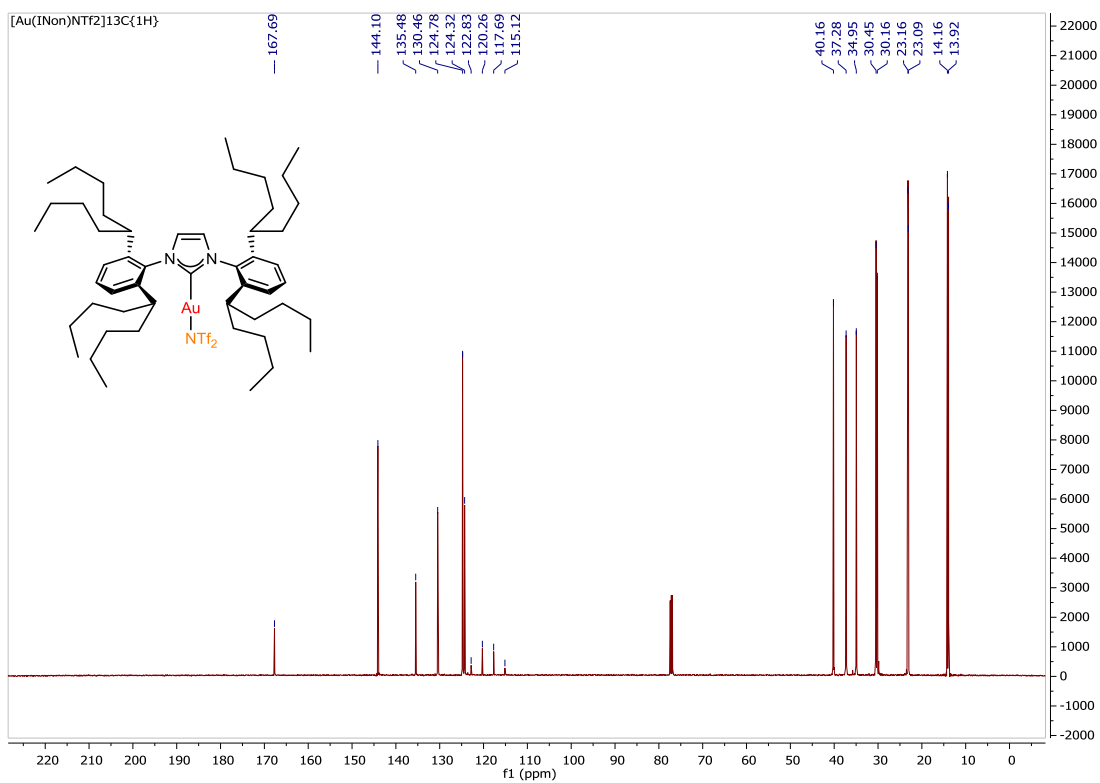

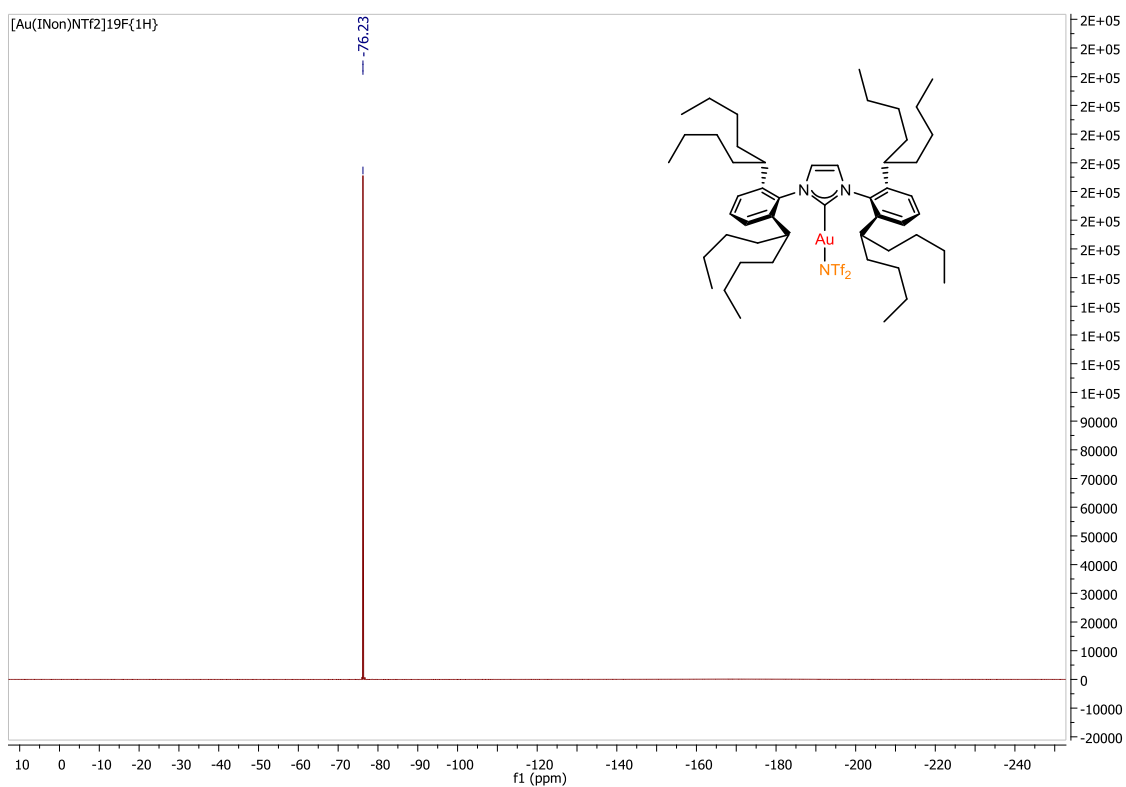

## References

1. Meiries, S.; Le Duc, G.; Chartoire, A.; Collado, A.; Speck, K.; Arachchige, K. S. A.; Slawin, A. M. Z.; Nolan, S. P., *Chem. Eur. J.* **2013**, *19*, 17358.
2. Patrick, S. R.; Collado, A.; Meiries, S.; Slawin, A. M. Z.; Nolan, S. P., *J. Organomet. Chem.* **2015**, *775*, 152.
3. Gaillard, S.; Slawin, A. M. Z.; Nolan, S. P., *Chem. Commun.* **2010**, *46*, 2742.
